# Supplementary material for: Matching the experimental chemical composition configuration and theoretical model in Nd2Fe14B/α-Fe nanocomposites to improve coercivity
Source: Royal Society of Chemistry journal article supplement (doi:10.1039/d4tc01278j), 2024-01-01
Supplement: d4tc01278j1.pdf [file d4tc01278j1.pdf]

## **Supplementary materials**

# **Matching experimental chemical composition configuration and theoretical model in Nd<sub>2</sub>Fe<sub>14</sub>B/ $\alpha$ -Fe nanocomposites to improve coercivity**

Yuqing Li, Jinjin Wang, Manying Liu, Xuerui Xu, Mengying Bian\*, Weiqiang Liu, Dongtao Zhang, Hongguo Zhang, Ming Yue\*

College of Materials Science and Engineering, Key Laboratory of Advanced Functional Materials, Ministry of Education of China, Beijing University of Technology, Beijing, 100124, China

\*Address correspondence to E-mail: [bianmy@bjut.edu.cn](mailto:bianmy@bjut.edu.cn) (Mengyin Bian), [yueming@bjut.edu.cn](mailto:yueming@bjut.edu.cn) (Ming Yue)

## SM-I: The amorphous $\text{Nd}_2\text{Fe}_{14}\text{B}/\alpha\text{-Fe}$ ribbons

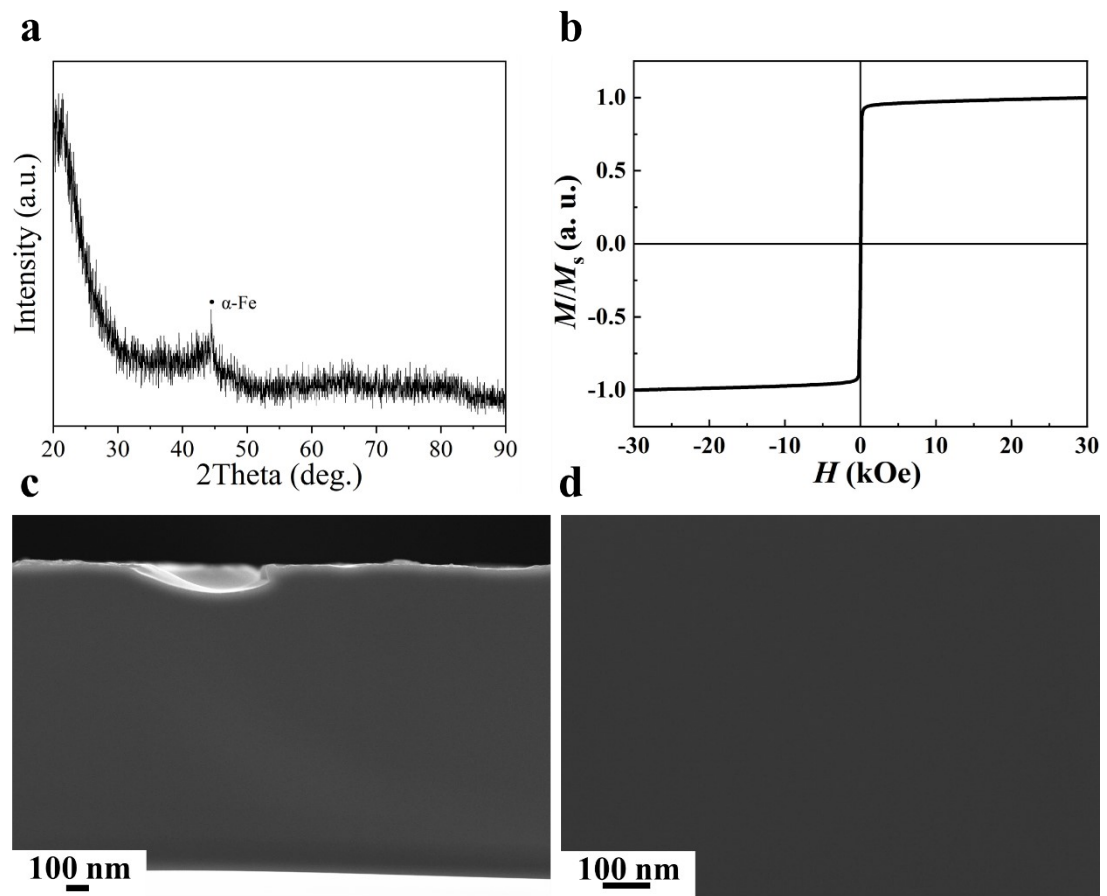

Fig. S1 The amorphous  $\text{Nd}_2\text{Fe}_{14}\text{B}/\alpha\text{-Fe}$  ribbons. a: XRD pattern; b: hysteresis loops; c and d: SEM fracture morphology.

## SM-II: Magnetic properties of the annealed amorphous ribbons

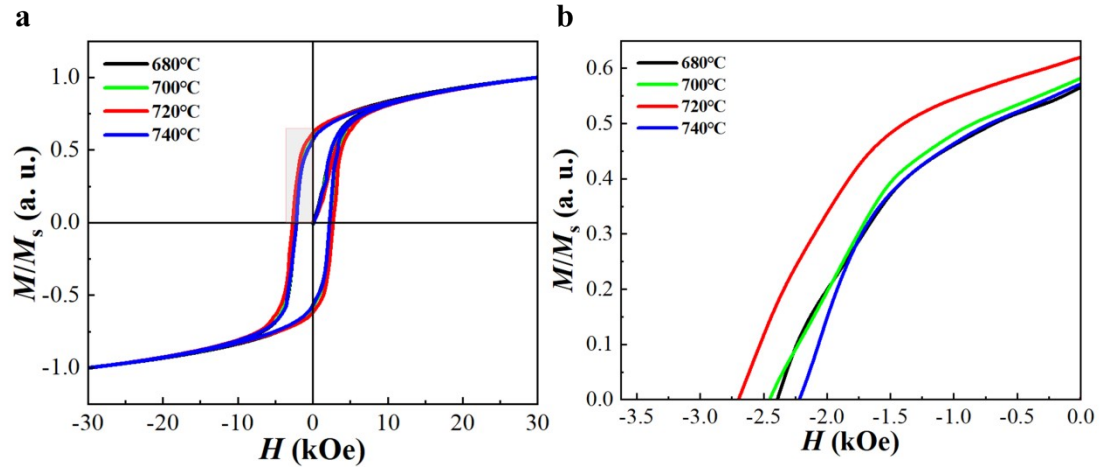

Fig. S2 Hysteresis loops (a) and demagnetization curves (b) of amorphous  $\text{Nd}_2\text{Fe}_{14}\text{B}/\alpha\text{-Fe}$  ribbons annealed at different temperatures.

### SM-III: Two typical ideal soft-hard composite models

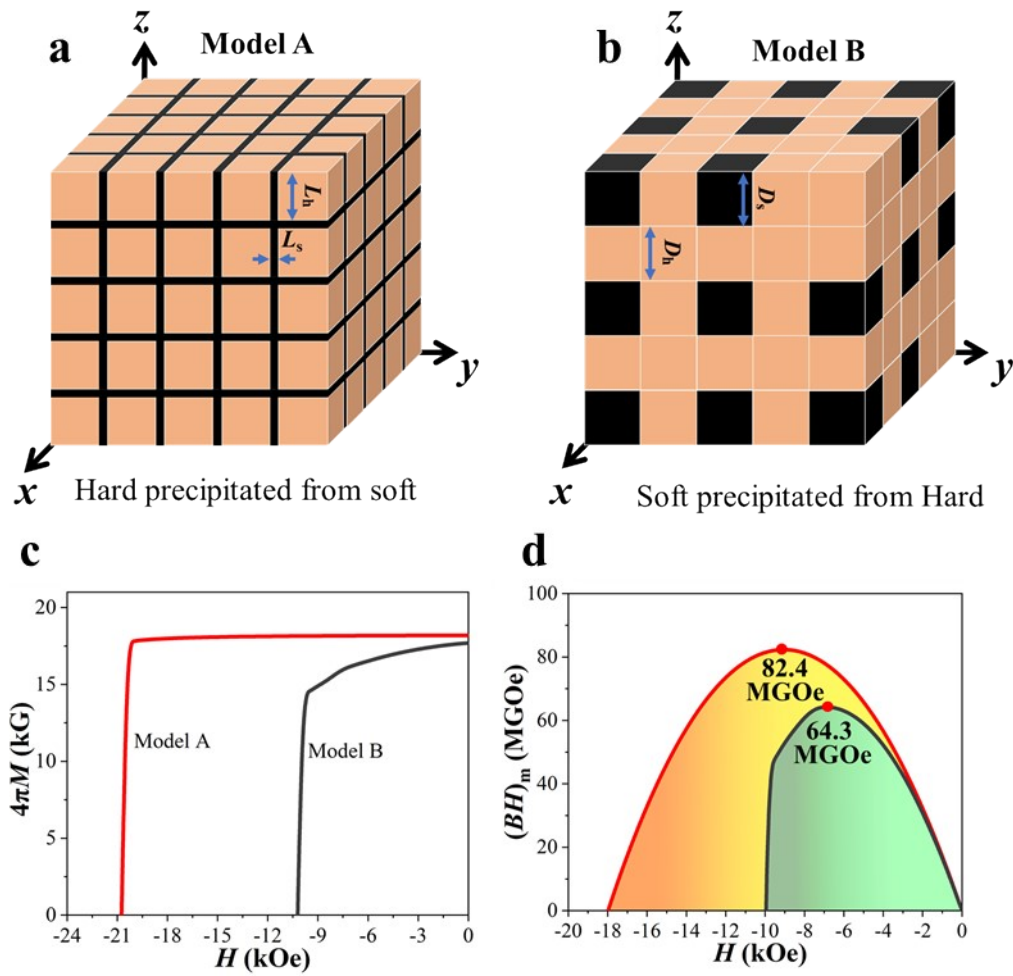

Fig. S3 Two typical soft hard composite models; a and b showing the diagrams of Model A and Model B, the hard phase precipitated on the soft phase matrix and the soft phase precipitated on the hard phase matrix respectively; c and d are demagnetization curves and magnetic energy product curves obtained from the two models, respectively.

#### **SM-IV: SEM graphs of the Tips for 3DAP**

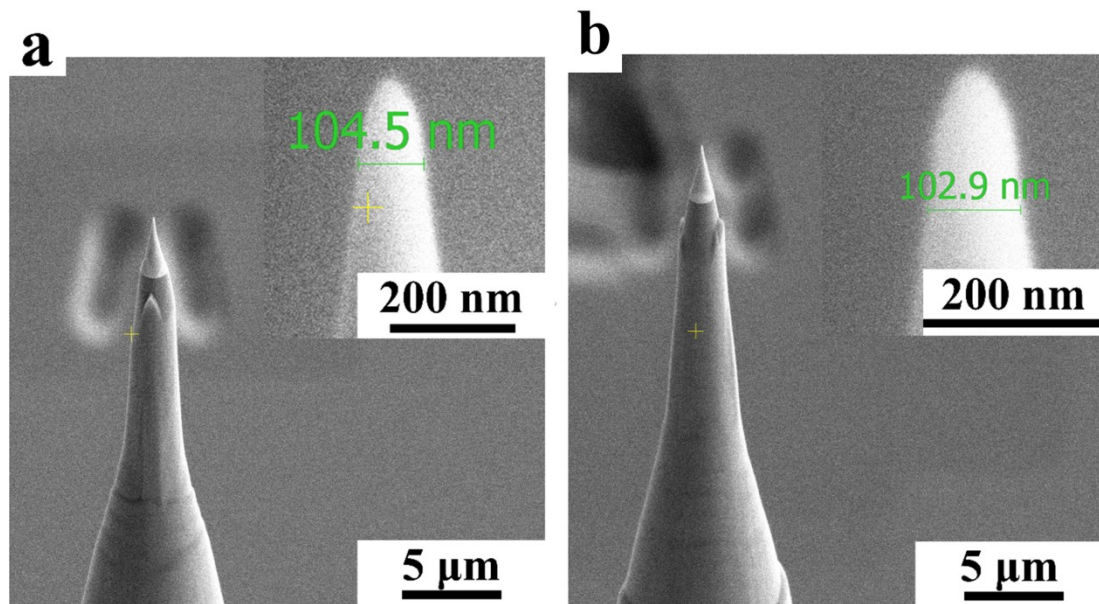

Fig. S4 The SEM graphs of the tips of Sample A (a) and Sample B (b).

#### **SM-V: Video 1 for 3D structure of sample A.**

#### **SM-VI: Video 2 for 3D structure of sample B.**
